# Supplementary material for: Reduced Risk of Oat Grain Contamination with Fusarium langsethiae and HT-2 and T-2 Toxins with Increasing Tillage Intensity
Source: MDPI journal article supplement (doi:10.3390/pathogens11111288), 2022-11-03
Supplement: s1 [file s1]

**Table S1:** The mean concentration of *Fusarium* DNA and mycotoxins in oat grain harvested year 2011 and 2012 from field plots receiving various tillage and straw removal treatments over a three-year period (2010-2012).

| Field <sup>1</sup> | Treatm. <sup>2</sup> | Fl DNA <sup>3,4</sup><br>(pg/μg) | (STD) <sup>5</sup> | Fg DNA <sup>3,4</sup><br>(pg/μg) | (STD)  | Fa DNA <sup>3,4</sup><br>(pg/μg) | (STD)  | DON <sup>6,4</sup><br>(μg/kg) | (STD)  | HT2+T2 <sup>6,4</sup><br>(μg/kg) | (STD) | ENNB<br>(μg/kg) | (STD) | ENNB1<br>(μg/kg) | (STD) | BEA<br>(μg/kg) | (STD) | NIV<br>(μg/kg) | (STD) |
|--------------------|----------------------|----------------------------------|--------------------|----------------------------------|--------|----------------------------------|--------|-------------------------------|--------|----------------------------------|-------|-----------------|-------|------------------|-------|----------------|-------|----------------|-------|
| Solør<br>2011      | DAP                  | 1707                             | (743)              | 2518                             | (570)  | 6928                             | (1971) | 573                           | (122)  | 165                              | (122) | NA <sup>7</sup> |       | NA               |       | NA             |       | NA             |       |
|                    | SSP                  | 1360                             | (751)              | 2109                             | (1032) | 5436                             | (2641) | 342                           | (154)  | 161                              | (144) | NA              |       | NA               |       | NA             |       | NA             |       |
|                    | SAH                  | 3030                             | (1746)             | 1419                             | (1131) | 6556                             | (3207) | 233                           | (167)  | 228                              | (122) | NA              |       | NA               |       | NA             |       | NA             |       |
|                    | SSH                  | 2560                             | (1893)             | 691                              | (460)  | 10348                            | (6636) | 189                           | (149)  | 205                              | (149) | NA              |       | NA               |       | NA             |       | NA             |       |
| Solør<br>2012      | DAP                  | 380                              | (129)              | 284                              | (37)   | 659                              | (322)  | 854                           | (447)  | 99                               | (40)  | 131             | (85)  | 15               | (9)   | 16             | (14)  | 210            | (89)  |
|                    | SSP                  | 598                              | (469)              | 520                              | (435)  | 250                              | (124)  | 1012                          | (876)  | 170                              | (84)  | 48              | (45)  | 6                | (7)   | 20             | (22)  | 196            | (75)  |
|                    | SAH                  | 1702                             | (1498)             | 135                              | (38)   | 891                              | (94)   | 610                           | (233)  | 340                              | (167) | 97              | (51)  | 10               | (4)   | 17             | (14)  | 157            | (53)  |
|                    | SSH                  | 2211                             | (429)              | 53                               | (36)   | 615                              | (446)  | 358                           | (193)  | 476                              | (165) | 61              | (58)  | 6                | (7)   | 21             | (14)  | 138            | (147) |
| Østfold<br>2011    | DAP                  | 1954                             | (288)              | 3375                             | (1882) | 3572                             | (738)  | 2102                          | (2131) | 34                               | (11)  | NA <sup>7</sup> |       | NA               |       | NA             |       | NA             |       |
|                    | SSP                  | 2845                             | (504)              | 4535                             | (648)  | 2243                             | (781)  | 1469                          | (1368) | 98                               | (34)  | NA              |       | NA               |       | NA             |       | NA             |       |
|                    | SAH                  | 2884                             | (857)              | 3471                             | (3538) | 1543                             | (562)  | 2001                          | (3647) | 152                              | (23)  | NA              |       | NA               |       | NA             |       | NA             |       |
|                    | SSH                  | 2710                             | (463)              | 1519                             | (2021) | 1629                             | (1158) | 247                           | (41)   | 196                              | (34)  | NA              |       | NA               |       | NA             |       | NA             |       |
| Østfold<br>2012    | DAP                  | 919                              | (473)              | 255                              | (145)  | 141                              | (49)   | 750                           | (777)  | 484                              | (180) | 26              | (16)  | 9                | (5)   | 11             | (8)   | 197            | (79)  |
|                    | SSP                  | 833                              | (244)              | 302                              | (228)  | 341                              | (156)  | 338                           | (100)  | 302                              | (102) | 18              | (21)  | 4                | (4)   | 8              | (8)   | 187            | (42)  |
|                    | SAH                  | 2375                             | (1718)             | 89                               | (57)   | 402                              | (502)  | 410                           | (267)  | 780                              | (512) | 8               | (17)  | 2                | (3)   | 4              | (6)   | 210            | (115) |
|                    | SSH                  | 1767                             | (1065)             | 179                              | (126)  | 328                              | (338)  | 453                           | (165)  | 564                              | (313) | 140             | (229) | 4                | (5)   | 7              | (9)   | 248            | (93)  |

1: The grain was harvested from non-inoculated experimental fields of oats at two locations in southeast Norway (Solør and Østfold) in 2011 and 2012.

2: The following tillage methods were included: DAP = deep autumn ploughing; SSP = shallow spring ploughing; SAH = shallow autumn harrowing; SSH = shallow spring harrowing.

3: DNA concentration of *Fusarium avenaceum* (Fa), *Fusarium graminearum* (Fg), and *Fusarium langsethiae* (Fl) in grain harvested from plots receiving the different tillage treatments. The DNA concentration is presented as pg DNA of the respective *Fusarium* species per μg plant DNA.

4: Each value is the average result from four plots receiving similar tillage treatment within a field. In two of these plots the straw was removed whereas in the other two plots the straw was chopped and retained in the field.

5: STD = standard deviation.

6: Mycotoxin concentration (μg/kg) in grain harvested from plots receiving the different tillage treatments. DON = deoxynivalenol, HT2+T2 = The sum of HT-2 and T-2 toxins, ENNB = Enniatin B, ENNB1 = Enniatin B1, BEA = beauvericin, NIV = nivalenol.

7: NA = Not analysed.
